# Supplementary material
Source: HighWire-hosted journal article supplement (https://ez-admanager.com/highwire/filestream/134722/field_highwire_adjunct_files/0/rosewich_945.pdf)
Supplement: rosewich_945.pdf [file rosewich_945.pdf]

# La expansión del espectro clínico y genético de las enfermedades relacionadas con ATP1A3

Hendrik Rosewich, MD  
Andreas Ohlenbusch,  
PhD  
Peter Huppke, MD  
Lars Schlotawa, MD  
Martina Baethmann, MD  
Inês Carrilho, MD  
Simona Fiori, MD  
Charles Marques  
Lourenço, MD  
Sarah Sawyer, MD, PhD  
Robert Steinfeld, MD,  
PhD  
Jutta Gärtner, MD\*  
Knut Brockmann, MD\*

## RESUMEN

**Objetivos:** Tuvimos como objetivo delinear el espectro clínico y genético de las enfermedades relacionadas con el gen ATP1A3 y el reconocimiento de una correlación genotipo-fenotipo.

**Métodos:** Identificamos 16 nuevos pacientes con hemiplejía alternante de la infancia (HAI) y 3 nuevos pacientes con distonía-parkinsonismo de inicio rápido (DPR) e incluimos éstos en nuestro análisis además de los hallazgos clínicos y moleculares de los 164 casos previamente reportados con HAI y DPR con mutaciones positivas.

**Resultados:** Las características principales compartidas entre HAI y DPR comprenden un llamativo movimiento anormal asimétrico, predominantemente distónico con gradiente de afectación rostro caudal y estresores físicos, emocionales o químicos como disparadores. El curso clínico es de inicio temprano y polifásico para la HAI, y más tardío mono y bifásico para la DPR, así como formas intermedias. Un metaanálisis de las 8 mutaciones novedosas y las 38 publicadas de ATP1A3 muestra que las que afectan los dominios transmembrana y funcionales tienden a estar asociadas a HAI como el fenotipo más severo. La mayoría de las mutaciones están localizadas en los exones 8, 14, 17 y 18.

**Conclusiones:** La HAI y la DPR constituyen fenotipos clínicos en un espectro continuo de enfermedades relacionados con el gen ATP1A3. El reconocimiento de fenotipos intermedios que combinan criterios de ambas condiciones está en aumento. Un análisis paso a paso eficiente de las mutaciones del gen ATP1A3 podría priorizar aquellos exones donde el conocimiento actual indica un agrupamiento mutacional. **Neurology® 2014;82:945-955.**

## GLOSARIO

**ATP1A3** = ATPasa, polipéptido alfa 3 transportador de Na<sup>+</sup>/K<sup>+</sup>; **DF** = dominio funcional; **DPR** = distonía-parkinsonismo de inicio rápido; **DT** = dominio transmembrana; **HAI** = hemiplejía alternante de la infancia.

La ATP1A3 es una Na<sup>+</sup>/K<sup>+</sup> -ATPasa neuronal específica de tipo p con una importancia particular en transporte acoplado de varias moléculas y sodio, la osmorregulación y la excitabilidad de nervios y músculos.<sup>1</sup> El reciente descubrimiento de que mutaciones en el gen ATP1A3 son la causa no solo de distonía-parkinsonismo de inicio rápido (DPR, DYT12)<sup>2,3</sup> si no también de la hemiplejía alternante de la infancia (HAI) ha ampliado el espectro de las enfermedades asociadas con ATP1A3.<sup>4-6</sup>

La DPR comprende un inicio abrupto de distonía asimétrica y parkinsonismo, frecuentemente luego de un disparador, con bradiquinesia e inestabilidad en la marcha así como también síntomas bulbares prominentes. El inicio de la enfermedad es frecuentemente en la segunda o tercera década de la vida, con rangos etarios reportados de 9 meses a 55 años.<sup>7,8</sup> La HAI se caracteriza por episodios recurrentes de hemiplejía y distonía con lateralidad alterante. Todos los pacientes presentan sus síntomas antes de los 18 meses.<sup>9</sup> Las manifestaciones paroxísticas son típicamente gatilladas por estrés físico o emocional y desaparecen con el sueño. Las manifestaciones no paroxísticas evolucionan luego de meses o años e incluyen retraso en el desarrollo, disartria y ataxia.

En este estudio, analizamos las características clínicas y genéticas de 16 pacientes nuevos con HAI, 3 pacientes nuevos con DPR y de todos los casos con HAI y DPR con mutaciones probadas en ATP1A3 reportados en la literatura. Nos hicimos las siguientes 3 preguntas: (1) ¿Son la HAI y la DPR condiciones alélicas o ambas enfermedades representan un fenotipo continuo de enfermedades relacionadas con ATP1A3? (2) ¿Es el espectro genotípico de la

\*Estos autores contribuyeron por igual a este trabajo.

Del Department of Pediatrics and Adolescent Medicine (H.R., A.O., P.H., L.S., R.S., J.G., K.B.), Division of Pediatric Neurology, University Medical Center Göttingen, Georg August University; Department of Pediatrics (M.B.), Hospital Dritter Orden, Munich, Germany; Departments of Pediatric Neurology (I.C.), Hospital Maria Pia do Centro Hospitalar do Porto, Portugal; 4IRCCS Stella Maris (S.F.), Calabrone, Pisa; Department of Clinical and Experimental Medicine (S.F.), University of Pisa, Italy; Neurogenetics Unit (C.M.L.), Department of Neurology, School of Medicine of Ribeirão Preto, University of São Paulo, Brazil; and Children's Hospital of Eastern Ontario (S.S.), Ottawa, Canada.

Ir a [Neurology.org](http://Neurology.org) para declaraciones de intereses completas. La información sobre financiamiento del estudio y declaraciones de intereses consideradas relevantes por los autores, si existiesen, se encuentran al final del artículo

Dirección para correspondencia al  
Dr. Gärtner:  
gaertnj@med.uni-goettingen.de

HAI y la DPR diferente y existe alguna correlación genotipo-fenotipo? (3) ¿Podemos delinear sitios de agrupación mutacional para un estudio diagnóstico más razonable y económico?

**MÉTODOS Cohorte de pacientes.** Para este estudio, reclutamos 19 pacientes derivados al *Department of Pediatric Neurology University Medicine Göttingen*, de departamentos de neurología en Alemania, y neurólogos de diferentes países de la Unión Europea, Canadá y Brasil entre febrero de 2009 y abril de 2013. Todos los pacientes reunían los criterios clínicos publicados para HAI<sup>10,11</sup> y DPR<sup>2,12</sup> y se proveyeron muestras de sangre entera.

**Aprobaciones de protocolos estándar, registros y consentimiento informado.** El comité institucional de revisión de la Facultad de Medicina de la *University of Göttingen*, Alemania, aprobó el estudio (archivo referencia 15/6/11). Se obtuvo consentimiento informado por escrito de participantes adultos, padres de participantes menores de 18 años y tutores de participantes adultos con discapacidad intelectual.

**Análisis clínico.** Las tablas 1, 2 y 3 muestran información clínica detallada de todos los pacientes nuevos. Además, se incluyen los datos clínicos disponibles de todos los pacientes con HAI y DPR con mutaciones en *ATP1A3* descritos en la literatura.<sup>3-8,13-26</sup> La evaluación de los datos clínicos de la literatura no se basó en escalas de evaluación de pacientes con distonía porque no permiten la descripción adecuada de las características fenotípicas particulares de HAI y DPR. Especialmente, las manifestaciones paroxísticas de la HAI y en menor medida de DPR, no están reflejadas por las escalas convencionales. Es más, no existe una escala de evaluación de pacientes con HAI aceptada. En cambio, para proporcionar la información fenotípica más robusta, recolectamos todos los signos y síntomas que implicaran una significancia fenotípica sobresaliente para enfermedades asociadas a *ATP1A3*, tal como han evolucionado en los estudios clínicos y genéticos en los últimos años.

**Análisis de las mutaciones.** El análisis de las mutaciones fue realizado de acuerdo a protocolos estándar.

**RESULTADOS Espectro clínico de las enfermedades relacionadas con ATP1A3.** Las tablas 1 y 2 resumen las manifestaciones paroxísticas y no paroxísticas de 16 pacientes nuevos que reúnen criterios clínicos de HAI.

**Meta-análisis de las características clínicas en la HAI.** El meta-análisis de los datos clínicos disponibles de pacientes con HAI con mutaciones en *ATP1A3* publicados previamente y de aquellos descritos por primera vez en este estudio permite la evaluación de los síntomas neurológicos y el curso de la enfermedad por frecuencia. Se reportaron episodios de hemiplejía, desaparición de los síntomas con el sueño y un gradiente rostro caudal (cara a brazo luego a pierna) en todos los pacientes. Otras manifestaciones paroxísticas incluidas en frecuencia decreciente eran episodios de movimientos oculares anormales, episodios distónicos, síntomas bulbares, episodios de disfunción autonómica, convulsiones y disturbios paroxísticos respiratorios. En casi todos los pacientes con HAI, las manifestaciones episódicas fueron gatilladas por al menos un evento provocador.

La discapacidad en el desarrollo de severidad variable fue la característica clínica no paroxística más común, seguida de disartria, ataxia, hipotonía muscular y coreoatetosis. Se vio una progresión de los síntomas no paroxísticos en un cuarto de todos los pacientes. En casi todos los pacientes, el curso

de la enfermedad fue polifásico con un comienzo en los primeros 18 años de vida y una recuperación rápida de los síntomas paroxísticos.

**Meta-análisis de las características clínicas en la DPR y en los casos intermedios HAI/DPR.** Un meta-análisis de los datos clínicos publicados disponibles de pacientes con DPR y mutaciones en *ATP1A3* y aquellos descritos por primera vez en este estudio permite la evaluación de los síntomas neurológicos y el curso de la enfermedad por frecuencia.

Mientras que los síntomas neurológicos característicos como el comienzo abrupto de distonía/hemiplejía, una afectación con gradiente rostro caudal, hallazgos bulbares prominentes y factores gatillo se ven en ambas la HAI y la DPR, la edad de comienzo y el curso clínico son diferentes en la mayoría de los casos. Un meta-análisis de estas características clínicas permite la identificación de fenotipos intermedios HAI/DPR.

Dos pacientes con HAI atípica y edad de comienzo de 3 y 2 años respectivamente<sup>21</sup> y un paciente con un fenotipo de DPR y una edad de comienzo de 11 meses<sup>8</sup> habían sido previamente reportados.

Los pacientes con *ATP1A3-31* y *ATP1A3-42* en este estudio muestran una secuencia de síntomas que combina un curso polifásico y monofásico y, por lo tanto, une los criterios de HAI y DPR. Síntomas neurológicos paroxísticos recurrentes habían sido previamente observados en pacientes con un fenotipo predominante de DPR.<sup>8,13,19</sup>

**Espectro genético de las enfermedades relacionadas con ATP1A3 (HAI, DPR y HAI/DPR).** La tabla 2 y la figura resumen los hallazgos genéticos moleculares en nuestra cohorte de 16 pacientes con HAI recientemente diagnosticada. Identificamos mutaciones en *ATP1A3* en 15 casos. Cinco mutaciones con cambio de sentido (*missense*) fueron novedosas (véanse tablas 2 y 3). La mutación T335P en el exón 9 está localizada solo 2 posiciones amino acídicas más adelante en la secuencia proteica que la mutación ya reportada C333F. Ambas mutaciones están localizadas cerca del dominio 4 transmembrana (DT4) y dentro del dominio funcional (DF) E1-E2 ATPasa de la subunidad  $\alpha 3$  de la  $\text{Na}^+/\text{K}^+$ -ATPasa. La segunda mutación con cambio de sentido novedosa, L757P, está localizada solo 2 posiciones amino acídicas más adelante en la secuencia proteica que las 2 mutaciones con cambio de sentido conocidas L755S y L755C. Las 3 mutaciones están localizadas cerca del TM5 (figura). Las mutaciones con cambio de sentido novedosas remanentes T804I, D805E e I810F se encuentran dentro de un agrupamiento de variantes patogénicas de la secuencia alrededor del TM6 (figura).

La tabla 3 y la figura muestran los hallazgos genéticos moleculares en nuestros 3 pacientes con DPR que tenían mutaciones novedosas con cambio de sentido que afectaban el exón 9 y 10 respectivamente. La mutación T370N está localizada en estrecha proximidad a la mutación con cambio de sentido L371P, reportada como patogénica y asociada con un fenotipo HAI. El triptófano de la mutación W382R está localizado en una región altamente conservada de la proteína. La mutación con cambio de sentido L417P es la única mutación

**Tabla 1 Manifestaciones paroxísticas en 16 pacientes con hemiplejía alternante de la infancia identificados en este estudio**

| Pacientes | Inicio |                   |                            | Características paroxísticas                            |                                      |          |              |                       |                              |                   |                                  |                           |  |
|-----------|--------|-------------------|----------------------------|---------------------------------------------------------|--------------------------------------|----------|--------------|-----------------------|------------------------------|-------------------|----------------------------------|---------------------------|--|
|           | Sexo   | Edad actual, a, m | Edad de presentación, a, m | Primeros síntomas                                       | Episodios de hemiplejía              | Gatillos | Convulsiones | Episodios de distonía | Episodios oculares anormales | Síntomas bulbares | Episodios de distonía autonómica | Desaparición con el sueño |  |
| ATP1A3-25 | F      | 9.1               | 1.0                        | Nistagmo                                                | c 1/f 5–10/d hasta 1 h               | +        | -            | c 1.0                 | c 1.0                        | +                 | -                                | +                         |  |
| ATP1A3-26 | M      | 12.9              | 0.3                        | Nistagmo, episodio de distonía, apatía                  | c 0, 4/f 10–15/d 1 min hasta 2 días  | +        | c 4.0        | c 0.3                 | c 0.3                        | +                 | +                                | +                         |  |
| ATP1A3-27 | F      | 7.2               | 0.2                        | Exotropía mono ocular y oculogiría                      | c 1, 8                               | +        | -            | c 0.6                 | c 0.2                        | -                 | ?                                | +                         |  |
| ATP1A3-28 | F      | 13.7              | 0.1                        | Exotropía mono ocular y nistagmo                        | c 0, 3                               | +        | c 11.0       | c 0.3                 | c 0.1                        | +                 | ?                                | +                         |  |
| ATP1A3-29 | M      | 2.6               | 0.2                        | Desviación de la mirada conjugada, nistagmo mono ocular | c 0, 6                               | +        | -            | c 0.5                 | c 0.2                        | +                 | ?                                | +                         |  |
| ATP1A3-30 | M      | 2.3               | 0.7                        | Episodios de distonía                                   | c 0, 9/f/d 1 h–2 días                | +        | -            | c 0.7                 | -                            | +                 | ?                                | +                         |  |
| ATP1A3-31 | M      | 18.9              | 1.6                        | Episodio de hemiplejía                                  | c 1, 6/f 1–25/d 10 min–4 sem         | +        | c 4.3        | c 0.1                 | c 4.3                        | +                 | -                                | -/+                       |  |
| ATP1A3-32 | F      | 12.4              | 0.2                        | Movimientos oculares hacia arriba y abajo               | c 2/f 20–30/d horas a días           | -        | c 1.1        | c 0.10                | c 0.2                        | +                 | +                                | +                         |  |
| ATP1A3-33 | F      | 5.4               | 0.1                        | Convulsiones                                            | c 2/f 1–12/d 1–14 días               | +        | c 0.1        | c ?                   | -                            | -                 | ?                                | +                         |  |
| ATP1A3-34 | M      | 4.7               | 0.11                       | Convulsiones tónico-clónicas                            | c 1, 6/f 2–4/d 3 h–3 días            | -        | c 0.11       | c 1.1                 | c 1.1                        | +                 | +                                | +                         |  |
| ATP1A3-35 | F      | 4.9               | 0.4                        | Episodio de distonía y estrabismo intermitente          | c 0, 9/f 2–28/d 1–8 h                | -        | ?            | c 0.4                 | c 0.4                        | +                 | +                                | +                         |  |
| ATP1A3-36 | M      | 18.10             | 1.0                        | Episodios de hemiplejía                                 | c 1, 0/f 2–4/d 1 h–3 días            | -        | -            | c 5.0                 | -                            | +                 | -                                | +                         |  |
| ATP1A3-37 | M      | 0.8               | 0.1                        | Movimiento ocular anormal, episodios de hemiplejía      | c 0, 1/f 1–30/d 2 h–4 días           | +        | -            | c 0.9                 | c 0.1                        | -                 | +                                | +                         |  |
| ATP1A3-38 | M      | 1.0               | 0.5                        | Episodios de hemiplejía                                 | c 0, 5/f 4–30/d 20 min–3 días        | -        | -            | -                     | c ?                          | -                 | -                                | +                         |  |
| ATP1A3-39 | F      | 4.3               | 0.1                        | Nistagmo, episodios de distonía                         | c 1, 9/f 3–10/d minutos hasta 3 días | +        | ?            | c 0.1                 | c 0.1                        | +                 | -                                | +                         |  |
| ATP1A3-40 | F      | 5.7               | 0.10                       | Movimiento ocular anormal, episodios de hemiplejía      | c 0, 10/f 4/d 4–5 h                  | +        | c 1.2        | c 2.0                 | c 0.10                       | +                 | ?                                | +                         |  |

Abreviaturas: c = comienzo (año, mes), f = frecuencia (rango de número de episodios/mes); d = duración.

**Tabla 2 Mutaciones en ATP1A3 y características clínicas no paroxísticas de 16 pacientes con hemiplejía alternante de la infancia identificados en este estudio**

| Código de paciente | Exón                                  | Mutación    | Características no paroxísticas |          |          |          |                                |                                    |                        |                    |               |        | Progresión de características no paroxísticas |
|--------------------|---------------------------------------|-------------|---------------------------------|----------|----------|----------|--------------------------------|------------------------------------|------------------------|--------------------|---------------|--------|-----------------------------------------------|
|                    |                                       |             | c.ADN                           | Proteína | Proteína | Proteína | Desarrollo cognitivo           | Mejor función motora, a, me        | Gradiente rostrocaudal | Hipotonía muscular | Coreoatetosis | Ataxia |                                               |
| ATP1A3-25          | 21                                    | c.2839G>A   | p.Gly947Arg                     | G947R    |          |          | Discapacidad intelectual       | Marcha sin asistencia a los 3, 0   | +                      | +                  | +             | +      | -                                             |
| ATP1A3-26          | 16                                    | c.2263G>A   | p.Gly755Ser                     | G755S    |          |          | Discapacidad intelectual       | Marcha sin asistencia a los 2, 6   | +                      | -                  | +             | +      | -                                             |
| ATP1A3-27          | 17                                    | c.2401G>A   | p.Asp801Asn                     | D801N    |          |          | Discapacidad intelectual       | Marcha sin asistencia a los 7, 0   | +                      | -                  | +             | ?      | ?                                             |
| ATP1A3-28          | 17                                    | c.2401G>A   | p.Asp801Asn                     | D801N    |          |          | Discapacidad intelectual       | Marcha sin asistencia a los 1, 6   | +                      | +                  | +             | ?      | ?                                             |
| ATP1A3-29          | 17                                    | c.2401G>A   | p.Asp801Asn                     | D801N    |          |          | Discapacidad en el aprendizaje | Marcha sin asistencia a los 1, 9   | +                      | -                  | -             | ?      | ?                                             |
| ATP1A3-30          | No se detectaron mutaciones en ATP1A3 |             |                                 |          |          |          | Discapacidad en el aprendizaje | Marcha sin asistencia a los 1, 1   | +                      | -                  | ?             | +      | -                                             |
| ATP1A3-31          | 18                                    | c.2428A>T   | p.ILe810Phe                     | I810F    |          |          | Discapacidad intelectual       | Marcha sin asistencia a los 1, 6   | +                      | -                  | +             | +      | -                                             |
| ATP1A3-32          | 17                                    | c.2411C>T   | p.Thr804Ile                     | T804I    |          |          | Discapacidad intelectual       | Marcha sin asistencia a edad de?   | ?                      | -                  | ?             | ?      | ?                                             |
| ATP1A3-33          | 18                                    | c.2443G>A   | p.Glu815Lys                     | E815K    |          |          | Discapacidad intelectual       | Sentarse sin asistencia a los 4, 1 | ?                      | +                  | +             | ?      | ?                                             |
| ATP1A3-34          | 20                                    | c.2780 G>A  | p.Cys927Tyr                     | C927Y    |          |          | Discapacidad intelectual       | Sentarse sin asistencia a los 2, 0 | +                      | +                  | -             | +      | +                                             |
| ATP1A3-35          | 8                                     | c.965T>A    | p.Val322Asp                     | V322D    |          |          | Discapacidad intelectual       | Marcha sin asistencia a los 2, 6   | +                      | -                  | +             | +      | -                                             |
| ATP1A3-36          | 17                                    | c.2270T>C   | p.Leu757Pro                     | L757P    |          |          | Discapacidad intelectual       | Marcha sin asistencia a los 1, 0   | +                      | -                  | +             | +      | -                                             |
| ATP1A3-37          | IVS18                                 | c.2542+1G>A |                                 |          |          |          | Discapacidad en el aprendizaje | Marcha sin asistencia a los 1, 6   | -                      | +                  | +             | +      | +lenta                                        |
| ATP1A3-38          | 17                                    | c.2401G>A   | p.Asp801Asn                     | D801N    |          |          | Discapacidad intelectual       | Sentarse sin asistencia a edad de? | -                      | +                  | -             | +      | -                                             |
| ATP1A3-39          | 9                                     | c.1003A>C   | p.Thr335Pro                     | T335P    |          |          | Discapacidad en el aprendizaje | Marcha sin asistencia a los 2, 2   | +                      | -                  | +             | +      | -                                             |
| ATP1A3-40          | 17                                    | c.2415C>G   | p.Asp805Glu                     | D805E    |          |          | Discapacidad intelectual       | Marcha sin asistencia a los 3, 0   | +                      | +                  | +             | +      | +                                             |

**Tabla 3 Características clínicas y mutaciones de pacientes con distonía-parkinsonismo de inicio rápido reportados en la literatura y en este estudio.**

| Pacientes                 |     | Mutación |                   |               |          | Fenotipo            |                                                                                                                        |                                 |                   | Referencias: Pacientes, mutaciones y estudios funcionales |                                                                  |                 |  |
|---------------------------|-----|----------|-------------------|---------------|----------|---------------------|------------------------------------------------------------------------------------------------------------------------|---------------------------------|-------------------|-----------------------------------------------------------|------------------------------------------------------------------|-----------------|--|
| Familias o casos aislados | No. | Exón     | c.ADN             | Proteína      | Proteína | Edad de comienzo, a | Gatillos                                                                                                               | Gradiente rostrocaudal          | Síntomas bulbares | Mejoría                                                   | Segundo evento                                                   |                 |  |
|                           | 1   | 8        | c.821T>C          | p.Ile274A>Thr | I274T    | 37                  | -                                                                                                                      | +                               | +                 | ?                                                         | -                                                                | 3, 7, 26        |  |
|                           | 3   | 8        | c.829G>A          | p.Glu277Lys   | E277K    | 20–26               | -(1)/+(1) fiebre, trauma encefalo craneano; 1 infección del tracto respiratorio)                                       | +                               | +                 | -(2)/+(1)                                                 | -(1)/+(1; 1 con un tercer evento)                                | 3, 7, 23        |  |
|                           | 1   | 8        | c.979_981delCTG   | p.327Leu>del  | 327Ldel  | 12                  | + exceso de ejercicio físico                                                                                           | +                               | +                 | +                                                         | -                                                                | 16              |  |
| <b>ATP1A3-41</b>          | 1   | 9        | c.1109C>A         | p.Thr.370Asn  | T370N    | 9                   | + infección del tracto respiratorio                                                                                    | +                               | +                 | +                                                         | +                                                                | Este estudio    |  |
| <b>ATP1A3-42</b>          | 1   | 9        | c.1144T>C         | p.Trp382Arg   | W382R    | 17                  | + actividad física                                                                                                     | +                               | +                 | +                                                         | -                                                                | Este estudio    |  |
| <b>ATP1A3-43</b>          | 1   | 10       | c.1250T>C         | p.Leu417Pro   | L417P    | 16                  | + consumo de alcohol                                                                                                   | +                               | +                 | -                                                         | -                                                                | Este estudio    |  |
|                           | 18  | 14       | c.1838C>T         | p.Thr613Met   | T613M    | 4–59                | -(8)/+(5) trauma encefalo craneano<br>V/o trauma emocional, 1 calor,<br>1 ejercicio en un día caluroso, 2 alcohol); 1? | +(17) <sup>-</sup> (1)          | -(4)/(14)         | -(10)/+(4)/(4)                                            | -(6)/(6)/(6)                                                     | 3, 7, 17–19, 25 |  |
|                           | 1   | 15       | c.2051C>T         | p.Ser684Phe   | S684F    | 30                  | + luego del parto                                                                                                      | +                               | +                 | ?                                                         | ?                                                                | 22              |  |
|                           | 1   | 17       | ?                 | p.Arg756His   | R756H    | 11m                 | + fiebre                                                                                                               | +                               | +                 | +                                                         | + (y un tercer evento)                                           | 3               |  |
|                           | 12  | 17       | c.2273T>G         | p.Ile758Ser   | I758S    | 14–45               | -(2)/+(1) luego del parto,<br>1 luego de correr/(8)                                                                    | +(8); solo brazos y piernas (4) | -(1)/(5)/(6)      | -(4)/(2)/(6)                                              | -(4)/+(1)/<br>distonía del<br>escribiente repetitiva,<br>(1)/(6) | 2, 3, 7         |  |
|                           | 2   | 17       | c.2338T>C         | p.Phe780Leu   | F780L    | 16 y 35             | -(1)/(1) luego de correr)                                                                                              | +                               | +                 | +                                                         | -                                                                | 3, 7            |  |
|                           | 4   | 17       | c.2401G>T         | p.Asp801Tyr   | D801Y    | 17–22               | -(1)/(1) caminando en un día caluroso)/(2)                                                                             | +                               | +                 | -                                                         | -(1)/(3)                                                         | 3, 7            |  |
|                           | 2   | 20       | c.2767G>A         | p.Asp923Asn   | D923N    | 4 y 20              | +(1) caminata larga y agotadora,<br>1 trauma encefalo-craneano leve y fiebre)                                          | +                               | +                 | -(1)/(1)                                                  | -(1)/(1)                                                         | 8, 13, 24       |  |
|                           | 1   | 23       | c.3191_3193dupTAC | p.1013Tyr>dup | 1013Ydup | 16                  | ?                                                                                                                      | +                               | +                 | ?                                                         | ?                                                                | 15              |  |

Los pacientes están distribuidos por secuencia de las mutaciones. -(#) = no. de pacientes no afectados; + (#) = no. de pacientes afectados; ? (#) = no. de pacientes sin información disponible.

**Figura** Localizaciones predichas de mutaciones en *ATP1A3* en la subunidad  $\alpha 3$  de la  $\text{Na}^+/\text{K}^+-\text{ATPasa}$

**A** ATP1A3 con dominios transmembrana

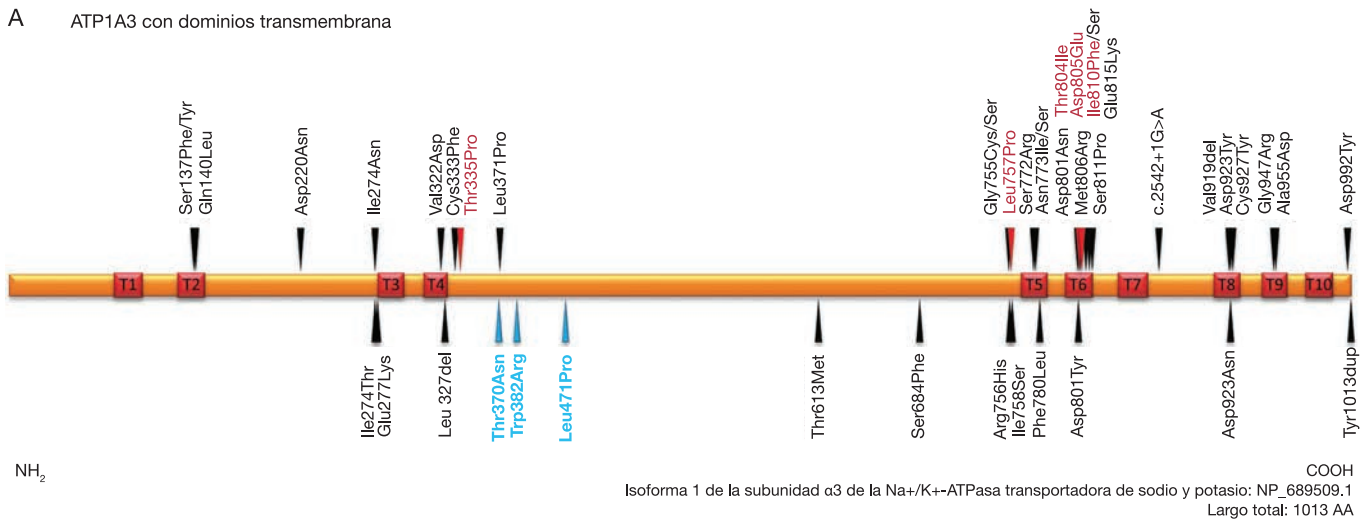

**B** ATP1A3 con dominios funcionales y conservados

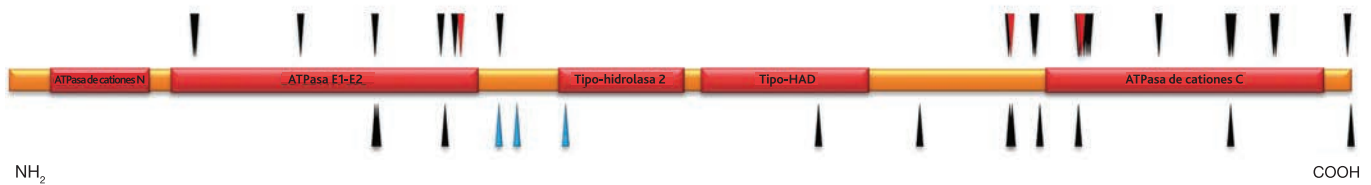

(A) La isoforma 1 de la subunidad  $\alpha 3$  de la ATPasa es la variante con cambio en el marco de lectura de la subunidad  $\alpha 3$ . En negro se muestran las mutaciones reportadas previamente en pacientes con hemiplejía alternante de la infancia (HAI) (las mutaciones se presentan arriba de la proteína) y distonía parkinsonismo de inicio rápido (las mutaciones se presentan debajo de la proteína). Las mutaciones identificadas en este estudio se muestran en rojo (HAI) y azul (DPR). Para pacientes con HAI, es evidente un agrupamiento de mutaciones en el primer y último tercio, especialmente en las regiones transmembrana de la proteína ATP1A3 (T1-10 = regiones transmembrana 1-10). (B) Se predice que varios dominios funcionales conservados de ATP1A3 y regiones transmembrana son afectados por cambios aminoácidos. ATPasa de cationes N = ATPasa transportadora de cationes, terminal N; tipo-HAD = tipo hidrolasa deshalogenasa de halo ácidos; ATPasa de cationes C, ATPasa transportadora de cationes, terminal C.

reportada en la DPR y HAI que está localizada en el DF tipo hidrolasa 2 de la subunidad  $\alpha 3$  de la  $\text{Na}^+/\text{K}^+-\text{ATPasa}$  (figura).

**Aspectos genotipo-fenotipo en las enfermedades relacionadas con ATP1A3.** La evaluación de los datos clínicos y genéticos de los 118 pacientes con HAI y 46 pacientes con DPR con mutaciones probadas en *ATP1A3* reportadas en la literatura<sup>3-8,13-26</sup> así como también los 15 pacientes con HAI y los 3 pacientes con DPR con mutaciones en *ATP1A3* descritos en este estudio provee pistas para una correlación genotipo-fenotipo.

A pesar de que mutaciones en pacientes con HAI y DPR están distribuidas sobre casi todos los dominios de la proteína ATP1A3, hay características típicas para cada fenotipo. Las mutaciones en casos esporádicos o familiares de HAI afectan los DTs de la proteína en 20 de 30 (67%), mientras que mutaciones en casos esporádicos o familiares de DPR afectan los DTs en 5 de 14 (36%) ( $p = 0,1$ ; *odds ratio* = 3,6; *Fisher exact test*). Los DFs designados de la subunidad  $\alpha 3$  de la  $\text{Na}^+/\text{K}^+-\text{ATPasa}$  (transportador de cationes/ATPasa en la terminal N, ATPasa E1-E2, tipo hidrolasa 2, hidrolasas halo ácidas tipo dehalogenasa y ATPasa transportadora de cationes en la terminal C) están afectadas en 22 de 30 mutaciones (73%) asociadas con una fenotipo de HAI

versus 7 de 14 cambios (50%) para la DPR ( $p = 0,18$ ; *odds ratio* = 2,75; *Fisher exact test*). Ningún paciente reportado hasta ahora con DPR presenta una mutación en un largo tramo en el terminal-N de la proteína ATP1A3 y 50% de todas las mutaciones asociadas con DPR afectan el bucle entre el DT4 y el DT5. Un agrupamiento de mutaciones en los DTs 2, 4, 5, 6, 8 y 9 de la proteína ATP1A3 es evidente para la HAI. Además, aproximadamente un cuarto de todas las mutaciones asociadas con fenotipos HAI están en la región alrededor del DT6 de la subunidad  $\alpha 3$  de la  $\text{Na}^+/\text{K}^+-\text{ATPasa}$ .

**Agrupamiento de mutaciones para las enfermedades relacionadas con ATP1A3.** La tabla 4 resume las mutaciones de pacientes con HAI y DPR novedosas y ya reportadas. Aproximadamente el 39% de todos los casos con HAI tienen la mutación con cambio de sentido D801N en el exón 17 y aproximadamente 23% de todos los pacientes con HAI son portadores de la mutación con cambio de sentido E815K en el exón 18. Se encontró un 5% adicional de mutaciones en el exón 17 y otro 8% fueron detectadas en el exón 18. Las mutaciones remanentes en los pacientes con HAI están distribuidas sobre los exones 5, 7, 8, 9, 16, 20, 21 y 22.

Para los fenotipos de DPR, los agrupamientos de mutaciones están localizados en los exones 8,

**Tabla 4 Espectro de mutaciones de las enfermedades relacionadas con *ATP1A3***

| Hemiplejía alternante de la infancia    |                   |              |                  |                    |            |                                              |                        |
|-----------------------------------------|-------------------|--------------|------------------|--------------------|------------|----------------------------------------------|------------------------|
| Mutación                                |                   |              |                  | Frecuencia         |            |                                              |                        |
| Exón                                    | c.ADN             | Proteína     | Proteína         | Frecuencia alélica | Porcentaje | Descrito en referencia                       |                        |
| 5                                       | c.410C>A          | p.Ser137Phe  | S137F            | 2                  | 1,50       | 4                                            |                        |
| 5                                       | c.410C>T          | p.Ser137Tyr  | S137Y            | 1                  | 0,75       | 4                                            |                        |
| 5                                       | c.419A>T          | p.Gln140Leu  | Q140L            | 1                  | 0,75       | 4                                            |                        |
| 7                                       | c.658G>A          | p.Asp220Asn  | D220N            | 1                  | 0,75       | 4                                            |                        |
| 8                                       | c.821T>A          | p.Ile274Asn  | I274N            | 2                  | 1,50       | 4, 6                                         |                        |
| 8                                       | c.965T>A          | p.Val322Asp  | V322D            | 2                  | 1,50       | Este estudio, paciente ATP1A3-35, 6          |                        |
| 9                                       | c.998G>T          | p.Cys333Phe  | C333F            | 2                  | 1,50       | 4                                            |                        |
| 9                                       | c.1003A>C         | p.Thr335Pro  | T335P            | 1                  | 0,75       | Este estudio, paciente ATP1A3-39             |                        |
| 9                                       | c.1112T>C         | p.Leu371Pro  | L371P            | 1                  | 0,75       | 6                                            |                        |
| 16                                      | c.2263G>A         | p.Gly755Ser  | G755S            | 2                  | 1,50       | Este estudio, paciente ATP1A3-26, 4          |                        |
| 16                                      | c.2263G>T         | p.Gly755Cys  | G755C            | 2                  | 1,50       | 5, 6                                         |                        |
| AM 17                                   | c.2270T>C         | p.Leu757Pro  | L757P            | 1                  | 0,75       | Este estudio, paciente ATP1A3-36             |                        |
| AM 17                                   | c.2316C>A         | p.Ser772Arg  | S772R            | 1                  | 0,75       | 6                                            |                        |
| AM 17                                   | c.2318A>T         | p.Asn773Ile  | N773I            | 1                  | 0,75       | 6                                            |                        |
| AM 17                                   | c.2318A>G         | p.Asn773Ser  | N773S            | 1                  | 0,75       | 4                                            |                        |
| AM 17                                   | c.2401G>A         | p.Asp801Asn  | D801N            | 52                 | 39,10      | Este estudio, pacientes ATP1A3-27-29/38, 4-6 |                        |
| AM 17                                   | c.2411C>T         | p.Thr804Ile  | T804I            | 1                  | 0,75       | Este estudio, paciente ATP1A3-32             |                        |
| AM 17                                   | c.2415C>G         | p.Asp805Glu  | D805E            | 1                  | 0,75       | Este estudio, paciente ATP1A3-40             |                        |
| AM 18                                   | c.2417T>G         | p.Met806Arg  | M806R            | 1                  | 0,75       | 4                                            |                        |
| AM 18                                   | c.2428A>T         | p.Ile810Phe  | I810F            | 1                  | 0,75       | Este estudio, paciente ATP1A3-31             |                        |
| AM 18                                   | c.2429T>G         | p.Ile810Ser  | I810S            | 1                  | 0,75       | 4                                            |                        |
| AM 18                                   | c.2431T>C         | p.Ser811Pro  | S811P            | 4                  | 3,01       | 4                                            |                        |
| AM 18                                   | c.2443G>A         | p.Glu815Lys  | E815K            | 30                 | 22,56      | Este estudio, paciente ATP1A3-33, 4-6        |                        |
| AM intrón 18                            | c.25 42+1G>A      |              | Sitio de empalme | 3                  | 2,26       | Este estudio, paciente ATP1A3-37, 4, 6       |                        |
| 20                                      | c.2755_2757delGTC | p.Val919del  | V919del          | 1                  | 0,75       | 4                                            |                        |
| 20                                      | c.2767G>T         | p.Asp923Tyr  | D923Y            | 1                  | 0,75       | 6                                            |                        |
| 20                                      | c.2767G>A         | p.Asp923Asn  | D923N            | 4                  | 3,01       | 21                                           |                        |
| 20                                      | c.2780G>A         | p.Cys927Tyr  | C927Y            | 2                  | 1,50       | Este estudio, paciente ATP1A3-34, 5          |                        |
| 21                                      | c.2839G>A         | p.Gly947Arg  | G947R            | 6                  | 4,51       | Este estudio, paciente ATP1A3-25, 4          |                        |
| 21                                      | c.2839G>C         | p.Gly947Arg  | G947R            | 2                  | 1,50       | 4                                            |                        |
| 21                                      | c.2864C>A         | p.Ala955Asp  | A955D            | 1                  | 0,75       | 4                                            |                        |
| 22                                      | c.2974G>T         | p.Asp992Tyr  | D992Y            | 1                  | 0,75       | 4                                            |                        |
|                                         |                   |              | Σ                | 133                | 100,00     |                                              |                        |
| Distonía-parkinsonismo de inicio rápido |                   |              |                  |                    |            |                                              |                        |
| Mutación                                |                   |              |                  | Frecuencia         |            |                                              |                        |
| Exón                                    | c.ADN             | Proteína     | Proteína         | Frecuencia alélica | Familias   | Porcentaje                                   | Descrito en referencia |
| AM 8                                    | c.821T>C          | p.Ile274AThr | I274T            | 1                  | 1          | 4,76                                         | 3, 7, 26               |
| AM 8                                    | c.829G>A          | p.Glu277Lys  | E277K            | 3                  | 3          | 14,29                                        | 3, 7, 23               |
| AM 8                                    | c.979_981delCTG   | p.327Leu     | 327Ldel          | 1                  | 1          | 4,76                                         | 16                     |

Continúa

**Tabla 4 Continuación**

| Disonía-parkinsonismo de inicio rápido |                   |              |          |                    |          |            |                                  |
|----------------------------------------|-------------------|--------------|----------|--------------------|----------|------------|----------------------------------|
| Mutación                               |                   |              |          | Frecuencia         |          |            |                                  |
| Exón                                   | c.ADN             | Proteína     | Proteína | Frecuencia alélica | Familias | Porcentaje | Descripto en referencia          |
| 9                                      | c.1109C>A         | p.Thr370Asn  | T370N    | 1                  | 1        | 4.76       | Este estudio, paciente ATP1A3-41 |
| 9                                      | c.1144T>C         | p.Trp382Arg  | W382R    | 1                  | 1        | 4.76       | Este estudio, paciente ATP1A3-42 |
| 10                                     | c.1250T>C         | p.Leu417Pro  | L417P    | 1                  | 1        | 4.76       | Este estudio, paciente ATP1A3-43 |
| AM 14                                  | c.1838C>T         | p.Thr613Met  | T613M    | 18                 | 5        | 23.81      | 3, 7, 14, 17–20, 25              |
| 15                                     | c.2051C>T         | p.Ser684Phe  | S684F    | 1                  | 1        | 4.76       | 22                               |
| AM 17                                  | ?                 | p.Arg756His  | R756H    | 1                  | 1        | 4.76       | 8                                |
| AM 17                                  | c.2273T>G         | p.Ile758Ser  | I758S    | 12                 | 1        | 4.76       | 3                                |
| AM 17                                  | c.2338T>C         | p.Phe780Leu  | F780L    | 2                  | 1        | 4.76       | 3, 7                             |
| AM 17                                  | c.2401G>T         | p.Asp801Tyr  | D801Y    | 4                  | 1        | 4.76       | 3, 7                             |
| 20                                     | c.2767G>A         | p.Asp923Asn  | D923N    | 2                  | 2        | 9.52       | 8, 13, 21                        |
| 23                                     | c.3191_3193dupTAC | p.1013Tyrdup | 1013Ydup | 1                  | 1        | 4.76       | 15                               |
| Σ                                      |                   |              |          | 49                 | 21       | 100,00     |                                  |

Abreviaturas: AM = sitio de agrupamiento de mutaciones.

Identificación del gen: 478; gen NG\_008015.1 genómica, referencia NM\_152296.4 del transcrito; secuencias NP\_689509.1 de la proteína; las localizaciones de las variaciones están basadas en estas referencias.

14 y 17. Contando cada familia o caso aislado con DPR como una ocurrencia única de la respectiva mutación, aproximadamente un 24% de todas las familias o pacientes aislados con DPR son portadores de una mutación en el exón 8, aproximadamente un 24% son portadores de la mutación T613M en el exón 14 y aproximadamente un 19% presentan una mutación en el exón 17. Las otras mutaciones reportadas hasta ahora en pacientes con DPR están dispersas por los exones 9, 10, 15, 20 y 23.

En conjunto, los *hotspots* de mutaciones en la HAI y la DPR están localizados en los exones 8 (HAI 3%, DPR 24%), 14 (HAI 0%, DPR 24%), 17 (HAI 44%, DPR 19%) y 18 (HAI 31%, DPR 0%). Por lo tanto, en casos de sospecha clínica de HAI y DPR, un abordaje racional para el análisis mutacional debería incluir como primer paso los exones 17 y 18 para pacientes con un fenotipo de HAI y exones 8, 14 y 17 para pacientes con un fenotipo de DPR.

**DISCUSIÓN** El meta-análisis de los hallazgos clínicos y genéticos de 18 nuevos pacientes con enfermedades relacionadas con ATP1A3 investigados en este estudio junto con los datos de 118 casos de HAI y 46 casos de DPR descritos en reportes previos<sup>3-8,13,15,17-20,22-27</sup> indica que (1) la HAI y la DPR constituyen enfermedades prototipo dentro de un espectro fenotípico continuo, (2) hay evidencia para una correlación genotipo-fenotipo y (3) el enfoque del análisis de las mutaciones en agrupaciones mutacionales en 4 exones del gen *ATP1A3* permite un abordaje diagnóstico eficiente con un 67% de probabilidad de detección de una mutación.

Ahora que las mutaciones heterocigotas en *ATP1A3* son reconocidas como la causa genética no solo de la DPR si no que de la HAI también, se aclara la relación nosológica de estas 2 condiciones. Aunque son consideradas 2 enfermedades

diferentes, una fenotipificación precisa muestra que las características clínicas principales son casi idénticas en la HAI y la DPR. Estas comprenden un movimiento anormal marcadamente asimétrico con predominio de disonía y en menor medida características atáxicas así como también un gradiente rostro caudal (cara a brazo y luego a pierna) de afectación con síntomas bulbares prominentes que incluyen disartria o incluso anartria, disfagia, hipomimia y movimientos oculares anormales. La bradiquinesia y la inestabilidad en la marcha, que son manifestaciones parkinsonianas conocidas de la DPR, también se observan en la HAI. El gatillo del comienzo de los síntomas por diferentes factores de estrés es también una característica típica en ambas enfermedades.

La diferencia más importante entre la HAI y la DPR es el curso clínico. El comienzo del fenotipo de HAI es por definición dentro de los primeros 18 meses y, por lo tanto, más temprano que en la DPR. Mientras que el curso de la enfermedad en la HAI se caracteriza por paroxismos recurrentes y frecuentes de inicio abrupto y rápida recuperación, se considera que el fenotipo de la DPR muestra un inicio primario abrupto y a veces un empeoramiento secundario abrupto de las características de la enfermedad, pero un patrón neurológico sin cambios posteriormente. Sin embargo, estas diferencias se disuelven con un análisis exhaustivo del curso clínico observado en muchos pacientes con DPR y de pacientes con fenotipos intermedios de HAI/DPR.

Reportes previos de pacientes con DPR mencionaron manifestaciones paroxísticas sobreimpuestas incluyendo crisis oculógiras,<sup>2</sup> disonía paroxística<sup>3</sup> y otros síntomas recurrentes gatillados por factores de estrés y que desaparecían con el sueño.<sup>8,13,19</sup>

Los pacientes ATP1A3-42 y ATP1A3-31 de este estudio representan ejemplos adicionales de



fenotipos intermedios con características clínicas combinadas de DPR y HAI.

Un criterio diagnóstico de larga data de HAI es el comienzo de los síntomas antes de los 18 meses de vida.<sup>10,11</sup> En contraste, el rango de edad de comienzo de DPR fue considerado de 4 a 55 años.<sup>7,13,19</sup> Sin embargo, reportes recientes describen casos de "HAI atípica" con comienzo luego de los 18 meses<sup>21</sup> así como también un paciente con DPR y un comienzo temprano a los 9 meses.<sup>8</sup>

Por consiguiente, mientras que la mayoría de los pacientes con mutaciones reconocidas en *ATPIA3* muestran fenotipos clínicos alineados con los criterios clásicos de HAI o DPR, numerosos casos con características intermedias proveen evidencia creciente de que ambas enfermedades son "manifestaciones diferentes de un espectro clínico" y no enfermedades alélicas.<sup>28</sup>

En este estudio, identificamos 8 mutaciones con cambio de sentido novedosas en *ATPIA3*. Por lo tanto, el espectro mutacional actual se extiende a 30 mutaciones con cambio de sentido diferentes, 1 delección y 1 inserción para HAI así como también a 12 mutaciones con cambio de sentido diferentes, 1 delección y 1 duplicación para la DPR. Estas mutaciones están distribuidas sobre todo el gen en ambas enfermedades (figura) con agrupamientos de mutaciones y pistas para una correlación genotipo-fenotipo. La mayoría de las mutaciones en pacientes con HAI están localizadas en los exones 17 y 18 del gen *ATPIA3* (74%). La mutación D801N en el exón 17 comprende aproximadamente el 39% de todas las mutaciones y la mutación E815K en el exón 18 comprende aproximadamente un 23%. Sitios de agrupamientos de mutaciones en pacientes con DPR son los exones 8, 14 y 17. La mutación T613M en el exón 14 comprende aproximadamente un 37% y la mutación I758S en el exón 17 aproximadamente un 24% de todas las mutaciones. Esto permite un estudio genético molecular más eficiente y económico en un paciente que se presenta con síntomas clínicos consistentes con una enfermedad relacionada con *ATPIA3*.

Encontramos algo de evidencia para una correlación genotipo-fenotipo. Las mutaciones de *ATPIA3* de pacientes con HAI clásica afectan más frecuentemente los DTs y los DFs de la subunidad  $\alpha 3$  de la  $\text{Na}^+/\text{K}^+$ -ATPasa que las mutaciones de pacientes con el fenotipo clásico de DPR (DT 67% vs 36%; DF 73% vs 50%). A pesar de que parece razonable que alteraciones en el DT o el DF contribuyan a un fenotipo más severo, la posición de la mutación por sí sola no explica suficientemente la variabilidad fenotípica. Las mutaciones que afectan la misma posición aminoácida fueron observadas en asociación con fenotipos diferentes, por ejemplo, I274N en HAI e I274T en DPR o D801N en HAI y D801Y en DPR (tabla 4) y estudios funcionales demostraron que sustituciones aminoácidas no sinónimas resultaron en alteraciones de la actividad de la subunidad  $\alpha 3$  de la  $\text{Na}^+/\text{K}^+$ -ATPasa marcadamente diferentes.<sup>20</sup>

Ambos pacientes con fenotipos intermedios son portadores de mutaciones novedosas en *ATPIA3*. Las consecuencias funcionales de estas mutaciones no han sido investigadas. La mutación I810F del paciente ATP1A3-31 afecta el TM6 así como la mayoría de las mutaciones de *ATPIA3* en pacientes con HAI. La sustitución aminoácida no sinónima

I810S fue descrita en un paciente con un fenotipo leve de HAI sin cuadriparesia, epilepsia, distonía, ataxia o corea.<sup>4</sup> Especulamos que las mutaciones en esta posición podrían comprometer las actividades de ATPasa y los niveles de expresión proteica en menor medida y entonces podrían resultar en fenotipos intermedios. La mutación W382R del segundo paciente (ATP1A3-42) con un fenotipo intermedio está localizada entre el cuarto y el quinto DT. Aproximadamente un 50% de todas las mutaciones en *ATPIA3* que se asocian a DPR están localizadas entre estos 2 DTs. Como esta mutación afecta a una región de la proteína altamente conservada, la actividad de ATPasa podría estar afectada más severamente, lo que podría explicar el fenotipo intermedio.

A la fecha actual, hay solamente una mutación reportada del gen *ATPIA3* que está relacionada con ambos fenotipos, DPR clásica y HAI clásica. La mutación D923N en el exón 20 asociada a DPR<sup>8,13,24</sup> estaba también presente en 4 miembros afectados de una familia con un patrón clínico esencialmente en línea con HAI.<sup>21</sup> La mutación ocurrió primero *de novo* y luego segregó con la enfermedad en 3 generaciones. La observación provee evidencia preliminar para una superposición HAI/DPR a nivel genotípico. Una explicación posible para la diversidad fenotípica en pacientes portadores de la mutación D923N podría ser que el nivel de expresión proteica es cercano al de las mutaciones de HAI.<sup>4</sup> Por lo tanto, como las mutaciones D801Y y L327del también muestran niveles de expresión comparables a mutaciones de HAI cuando son expresadas en células COS-7 o HeLa,<sup>4</sup> podría también haber pacientes con una HAI clásica, DPR clásica o fenotipos HAI/DPR clásicos asociados con estas 2 mutaciones.

El hecho de que sustituciones aminoácidas no sinónimas en la misma posición podría resultar en fenotipos diferentes y que una y la misma mutación resulta en características divergentes indica claramente que la posición de la mutación por sí sola no es responsable de la variabilidad fenotípica. Anormalidades estructurales de la proteína y/o anormalidades de la función de la proteína que incluyen localización proteica sub celular, actividad de ATPasa residual, capacidad de unión y transporte de iones residual, así como también otros factores genéticos, epigenéticos y ambientales, podrían contribuir a la variación de los fenotipos clínicos en las enfermedades relacionadas con *ATPIA3*.

En uno de nuestros 16 pacientes con síntomas claros de HAI, no pudimos identificar una mutación en *ATPIA3*. Las tasas de mutaciones descritas en reportes previos se encontraron en el rango de 74%<sup>4</sup> al 100%<sup>5,6</sup> en pacientes que cumplían criterios diagnósticos de HAI. Explicaciones posibles para un análisis mutacional negativo en pacientes con HAI comprenden malinterpretación del fenotipo clínico que presentan superposición con HAI como el síndrome de deficiencia de Glut1,<sup>29</sup> la presencia de microdelecciones o duplicaciones, que afectan exones y no se pueden detectar por secuenciación por método de Sanger, y presencia de otros genes causales del fenotipo HAI.

Como hemos demostrado en este estudio, hay evidencia en aumento de que la DPR y la HAI constituyen un continuo de enfermedades relacionadas con *ATPIA3*, con HAI en el extremo más severo

del espectro y DPR como una variante más leve. Estudios futuros deberían compilar criterios revisados para el diagnóstico de las enfermedades relacionadas con ATP1A3. Estos criterios deberían incluir casos de HAI y DPR clásicas así como también fenotipos intermedios de HAI/DPR que no son capturados en los criterios diagnósticos actuales.

#### CONTRIBUCIONES DE LOS AUTORES

Hendrik Rosewich: escritura y revisión del manuscrito para el contenido incluyendo escritura de contenido médico, concepto y diseño del estudio, análisis e interpretación de datos, adquisición de datos, análisis estadístico, supervisión o coordinación del estudio. Andreas Ohlenbusch, Peter Huppke, Lars Schlotawa, Martina Baethmann, Inês Carrilho, Simona Fiori, Charles Marques Lourenço, Sarah Sawyer, y Robert Steinfeld: análisis o interpretación de datos, adquisición de datos. Jutta Gärtner y Knut Brockmann: escritura y revisión del manuscrito para el contenido incluyendo escritura de contenido médico, concepto y diseño del estudio, concepto y diseño del estudio, análisis e interpretación de datos, adquisición de datos, supervisión o coordinación del estudio.

#### FINANCIAMIENTO DEL ESTUDIO

No se reportó financiamiento dirigido a este estudio.

#### DECLARACIÓN DE INTERESES

Los autores reportan no tener intereses que declarar relevantes a este manuscrito. Ir a Neurology.org para declaración de intereses completa.

Recibido el 8 de julio de 2013. Aceptado en su forma final el 3 de Diciembre de 2013.

#### REFERENCIAS

- Dobretsov M, Stimers JR. Neuronal function and alpha3 isoform of the Na/K-ATPase. *Front Biosci* 2005;10:2373–2396.
- Dobyns WB, Ozelius LJ, Kramer PL, et al. Rapid-onset dystonia-parkinsonism. *Neurology* 1993;43:2596–2602.
- de Carvalho Aguiar P, Sweadner KJ, Penniston JT, et al. Mutations in the Na1/K1-ATPase alpha3 gene ATP1A3 are associated with rapid-onset dystonia parkinsonism. *Neuron* 2004;43:169–175.
- Heinzen EL, Swoboda KJ, Hitomi Y, et al. De novo mutations in ATP1A3 cause alternating hemiplegia of childhood. *Nat Genet* 2012;44:1030–1034.
- Ishii A, Saito Y, Mitsui J, et al. Identification of ATP1A3 mutations by exome sequencing as the cause of alternating hemiplegia of childhood in Japanese patients. *PLoS One* 2013;8:e56120.
- Rosewich H, Thiele H, Ohlenbusch A, et al. Heterozygous de-novo mutations in ATP1A3 in patients with alternating hemiplegia of childhood: a whole-exome sequencing gene-identification study. *Lancet Neurol* 2012;11:764–773.
- Brashear A, Dobyns WB, de Carvalho Aguiar P, et al. The phenotypic spectrum of rapid-onset dystonia-parkinsonism (RDP) and mutations in the ATP1A3 gene. *Brain* 2007;130:828–835.
- Brashear A, Mink JW, Hill DE, et al. ATP1A3 mutations in infants: a new rapid-onset dystonia-Parkinsonism phenotype characterized by motor delay and ataxia. *Dev Med Child Neurol* 2012;54:1065–1067.
- Fusco L, Vigeveno F. Alternating hemiplegia of childhood: clinical findings during attacks. In: Andermann F, Aicardi J, Elmslie FV, editors. *Alternating Hemiplegia of Childhood*. New York: Raven Press; 1995:29–41.
- Bourgeois M, Aicardi J, Goutieres F. Alternating hemiplegia of childhood. *J Pediatr* 1993;122:673–679.
- Panagiotakaki E, Gobbi G, Neville B, et al. Evidence of a non-progressive course of alternating hemiplegia of

childhood: study of a large cohort of children and adults. *Brain* 2010;133:3598–3610.

- Brashear A, DeLeon D, Bressman SB, Thyagarajan D, Farlow MR, Dobyns WB. Rapid-onset dystonia-parkinsonism in a second family. *Neurology* 1997;48:1066–1069.
- Anselm IA, Sweadner KJ, Gollamudi S, Ozelius LJ, Darras BT. Rapid-onset dystonia-parkinsonism in a child with a novel atp1a3 gene mutation. *Neurology* 2009;73:400–401.
- Barbano RL, Hill DE, Snively BM, et al. New triggers and non-motor findings in a family with rapid-onset dystonia-parkinsonism. *Parkinsonism Relat Disord* 2012;18:737–741.
- Blanco-Arias P, Einholm AP, Mamsa H, et al. A C-terminal mutation of ATP1A3 underscores the crucial role of sodium affinity in the pathophysiology of rapid-onset dystonia-parkinsonism. *Hum Mol Genet* 2009;18:2370–2377.
- Kamm C, FogelW, Wachter T, et al. Novel ATP1A3 mutation in a sporadic RDP patient with minimal benefit from deep brain stimulation. *Neurology* 2008;70:1501–1503.
- Lee JY, Gollamudi S, Ozelius LJ, Kim JY, Jeon BS. ATP1A3 mutation in the first Asian case of rapid-onset dystonia-parkinsonism. *Mov Disord* 2007;22:1808–1809.
- Linazasoro G, Indakoetxea B, Ruiz J, Van Blercom N, Lasa A. Possible sporadic rapid-onset dystonia-parkinsonism. *Mov Disord* 2002;17:608–609.
- Pittock SJ, Joyce C, O’Keane V, et al. Rapid-onset dystonia-parkinsonism: a clinical and genetic analysis of a new kindred. *Neurology* 2000;55:991–995.
- Rodacker V, Toustrup-Jensen M, Vilsen B. Mutations Phe785Leu and Thr618Met in Na1,K1-ATPase, associated with familial rapid-onset dystonia parkinsonism, interfere with Na1 interaction by distinct mechanisms. *J Biol Chem* 2006;281:18539–18548.
- Roubergue A, Roze E, Vuillaumier-Barrot S, et al. The multiple faces of the ATP1A3-related dystonic movement disorder. *Mov Disord* 2013;28:1457–1459.
- Svetel M, Ozelius LJ, Buckley A, et al. Rapid-onset dystonia-parkinsonism: case report. *J Neurol* 2010;257:472–474.
- Tarsy D, Sweadner KJ, Song PC. Case records of the Massachusetts General Hospital: case 17-2010—a 29-year-old woman with flexion of the left hand and foot and difficulty speaking. *N Engl J Med* 2010;362:2213–2219.
- Zanotti-Fregonara P, Vidailhet M, Kas A, et al. [123I]-FPCIT and [99mTc]-HMPAO single photon emission computed tomography in a new sporadic case of rapid-onset dystonia-parkinsonism. *J Neurol Sci* 2008;273:148–151.
- Zaremba J, Mierzevska H, Lysiak Z, Kramer P, Ozelius LJ, Brashear A. Rapid-onset dystonia-parkinsonism: a fourth family consistent with linkage to chromosome 19q13. *Mov Disord* 2004;19:1506–1510.
- Kamphuis DJ, Koelman H, Lees AJ, Tijssen MA. Sporadic rapid-onset dystonia-parkinsonism presenting as Parkinson’s disease. *Mov Disord* 2006;21:118–119.
- Brashear A, Cook JE, Hill DE, et al. Psychiatric disorders in rapid-onset dystonia-parkinsonism. *Neurology* 2012;79:1168–1173.
- Ozelius LJ. Clinical spectrum of disease associated with ATP1A3 mutations. *Lancet Neurol* 2012;11:741–743.
- Rotstein M, Doran J, Yang H, Ullner PM, Engelstad K, De Vivo DC. Glut1 deficiency and alternating hemiplegia of childhood. *Neurology* 2009;73:2042–2044.
